# Supplementary material
Source: Springer Nature journal article supplement (https://www.springermedizin.de/resource/supplementary/12885_2011_2997_MOESM7_ESM.pdf/9462498)

## UMRC2 Cells

mRNA Expression  
(Relative to Control)

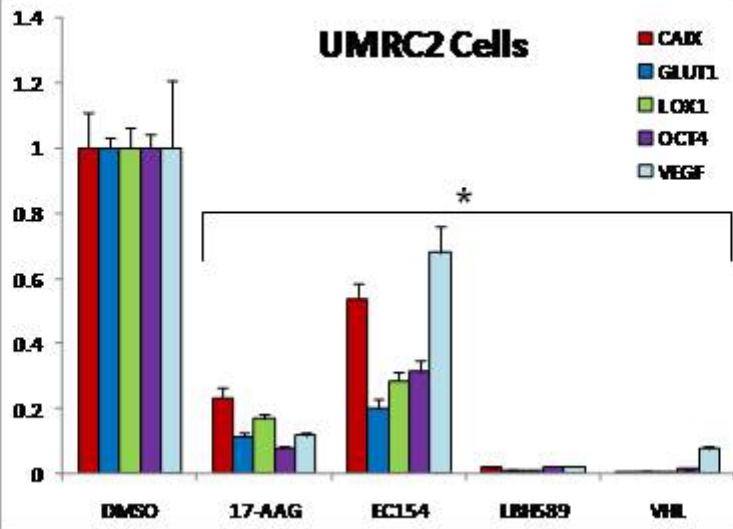

Supplement: MOESM7 [file 9462498]
